# ***Pseudomonas* mRNA 2.0: Boosting Gene Expression Through Enhanced mRNA Stability and Translational Efficiency.**

**Dário Neves<sup>1</sup>, Stefan Vos<sup>1</sup>, Lars M. Blank<sup>1</sup>, and Birgitta E. Ebert<sup>1,\*†</sup>**

<sup>1</sup>Institute of Applied Microbiology-iAMB, Aachen Biology and Biotechnology-ABBt, RWTH Aachen University, Germany

<sup>†</sup>present address: Australian Institute for Bioengineering and Nanotechnology, The University of Queensland, Brisbane, QLD, Australia

**\*Correspondence:** Dr. Birgitta E. Ebert, [birgitta.ebert@uq.edu.au](mailto:birgitta.ebert@uq.edu.au)

## **Abstract**

High gene expression of enzymes partaking in recombinant production pathways is a desirable trait among cell factories belonging to all different kingdoms of life. High enzyme abundance is generally aimed for by utilizing strong promoters, which ramp up gene transcription and mRNA levels. Increased protein abundance can alternatively be achieved by optimizing the expression on the post-transcriptional level. Here, we evaluated protein synthesis with a previously proposed optimized gene expression architecture, in which mRNA stability and translation initiation are modulated by genetic parts such as self-cleaving ribozymes and a bicistronic design, which have initially been described to support the standardization of gene expression. The optimized gene expression architecture was tested in *Pseudomonas taiwanensis* VLB120, a promising, novel microbial cell factory. The expression cassette was employed on a plasmid basis and after single genomic integration. We used three constitutive and two inducible promoters to drive the expression of two fluorescent reporter proteins and a short acetoin biosynthesis pathway. The performance was confronted with that of a traditional expression cassette harboring the same promoter and gene of interest but lacking the genetic parts for increased expression efficiency. The optimized expression cassette granted higher protein abundance independently of the expression basis or promoter used proving its value for applications requiring high protein abundance.

**Keywords:** Synthetic Biology, ribozymes, bicistronic design, *Pseudomonas taiwanensis* VLB120, mRNA stability, high gene expression

## **1 Introduction**

Cell factories have become an established role player in the sustainable production of chemicals and biological products proven with hundreds of billions of USD/year value on global markets (Davy et al., 2017). A commonality in the development of such cell factories is the continuous pursuit of increased productivities through directed or selection-based genetic engineering methods. With both approaches, increasing activity of the partaking pathways commonly leads to the desired rise in

37 productivity. High enzyme activity can be achieved by optimization of transcription, translation, post-  
38 translational modifications, and the process conditions (Liu et al., 2013). A common strategy is to  
39 employ strong promoters to overexpress product biosynthesis genes. Highly-active promoters achieve  
40 increased protein production rates by increasing the respective mRNA levels in the cell. However,  
41 previous studies have shown that high, recombinant gene expression leads to metabolic burden and  
42 consequently to growth impairment (Borkowski et al., 2016; Carneiro et al., 2013). Such hindrances  
43 are related to the drainage of biosynthetic precursors, such as nucleotides, or seizing of the cellular  
44 transcriptional machinery.  
45 In recent years, Synthetic Biology parts emerged that support high enzyme activities without the need  
46 for strong gene expression, thereby contributing to diminishing competition and depletion of the  
47 cellular mRNA pool and lightening the metabolic burden. Two translation-focused approaches can be  
48 distinguished that target to optimize translation rather than transcription. To this end, the first approach  
49 attempts to stabilize mRNA, whereas the second seeks to increase translational efficiency. Increasing  
50 mRNA stability is possible by placing stabilizing sequences in the 5' untranslated region (UTR) that  
51 avoid endoribonuclease attacks through their secondary structures as in *Escherichia coli* (Carrier and  
52 Keasling, 1997; Viegas et al., 2018). The implementation of ribozymes upstream of the ribosome  
53 binding site (RBS) allows the insulation of the desired expression cassette from the genetic context  
54 (Lou et al., 2012). Besides the intrinsic cleaving activity, the ribozymes developed by Lou et al.  
55 contained a 23 nucleotide hairpin downstream of the catalytic core, which additionally adds an mRNA  
56 stabilizing trait to this genetic part (Clifton et al., 2018).  
57 One approach within the second category, which focuses on translational efficiency, allows increased  
58 expression levels by facilitating the access of the ribosome to the RBS. In the traditional operon  
59 architecture (Figure 1 A), it is possible that gene of interest (GOI)-dependent secondary structures  
60 arise. This folding of the mRNA can block the access of ribosomes to the RBS thereby compromising  
61 the desired gene expression (Salis et al., 2009). Mutalik et al. developed a 'bicistronic design' which  
62 takes advantage of the intrinsic helicase activity of ribosomes to unveil any RBS-GOI dependent  
63 secondary structure and consequently achieve GOI-independent expression (Mutalik et al., 2013). In  
64 the bicistronic design, a short leading peptide cistron is allocated upstream of the GOI. The RBS of the  
65 GOI is enclosed within the coding sequence of the leading cistron, whereas the start codon of the GOI  
66 is fused to the stop codon of the leading cistron. The leading RBS-small peptide combination is known  
67 to not create any secondary structures, which assures the binding of a ribosome. Once the ribosome  
68 binds to the first RBS and starts to translate the leading peptide, any possible downstream RBS-GOI  
69 dependent secondary structures are unveiled by its intrinsic helicase activity exposing the RBS of the  
70 GOI. Otto et al. recently combined the bicistronic design with an upstream ribozyme to increase the  
71 translational efficiency of heterologous genes integrated in rRNA operons. Here the intention of the  
72 ribozyme integration was not to stabilize the mRNA but to increase translation efficiency by reducing  
73 a potential steric hindrance by the bulky 5' 16S mRNA flank and thereby facilitating ribosome docking.  
74 To this end, the ribozyme was placed upstream of the RBS, and this integration indeed resulted in a  
75 substantial increase in protein production (Otto et al., 2019).

76 Nielsen et al. proposed the compilation of these and further genetic parts into an overall standardized  
77 gene expression cassette for the assembly of genetic circuits (Figure 1 B) (Nielsen et al., 2013). Besides  
78 the incorporation of the gene expression parts described above, Nielsen et al. proposed the isolation of  
79 the expression cassette with bidirectional terminators on both ends and the integration of an RNase III  
80 site downstream of the GOI to further reduce context-specific effects. The impact of an RNase III site  
81 downstream of the GOI was evaluated by Cambray et al. within the scope of reliable terminator  
82 characterization (Cambray et al., 2013). Their extensive work showed that despite an overall decrease  
83 in expression level upon RNA III site incorporation, possibly due to a shorter mRNA half-life, a much  
84 narrower and precise expression level can be achieved. These promoter-independent gene expression

85 tools have been individually characterized but, to our knowledge, a possible synergistic and expression  
86 enhancing effect of their combination is yet to be explored.

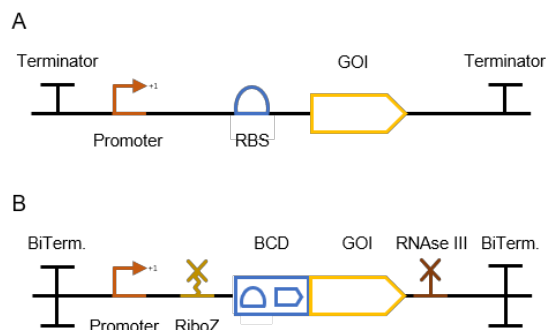

87

88 **Figure 1.** Gene expression cassette architectures represented with glyphs compliant with Synthetic  
89 Biology Open Language Visual (SBOLv). (A) A traditional gene expression cassette comprising a  
90 promoter, an RBS, and a gene of interest (GOI), (B) an optimized gene expression cassette as proposed  
91 by Nielsen et al., framed between two bidirectional terminators (Bi. term.) and encompassing a  
92 promoter, a ribozyme (RiboZ), the bicistronic design (BCD) developed by Mutalik et al. (Mutalik et  
93 al., 2013), a GOI and an RNase III site.

94

95 In this work we constructed optimized gene expression cassettes based on the architecture proposed by  
96 Nielsen et al. and evaluated the performance against traditional configurations using two fluorescence  
97 proteins (*msfGFP* and *mCherry*) and recombinant acetoin production as readout (Landgraf, 2012).  
98 The constructed, optimized gene expression cassettes were evaluated on a plasmid basis and after  
99 single-copy genomic integration (Wierckx et al., 2005). Overall, the traditional and optimized gene  
100 expression cassette variants were characterized with three constitutive and two inducible promoters.  
101 Reducing the overall size of the optimized gene expression cassette while maintaining its performance  
102 was also targeted in this work. Besides the characterization of several constructs, qPCR analysis was  
103 performed to elucidate the role of mRNA stability in altered protein expression.  
104 We chose *Pseudomonas taiwanensis* VLB120 as expression host as this Gram-negative bacterium  
105 exhibits industrial relevant, metabolic capabilities such as broad carbon source utilization, the ability  
106 to proliferate in the presence of organic solvents, and an almost byproduct free metabolism (Köhler et  
107 al., 2013; Park et al., 2007). *P. taiwanensis* VLB120 has been proven a suitable biocatalyst for the  
108 production of (*S*)-styrene oxide, phenol, isobutyric acid, and 4-hydroxybenzoic acid (Lang et al., 2014;  
109 Lenzen et al., 2019; Panke et al., 1998; Wynands et al., 2018). The novel expression device developed  
110 in this study contributes to more effective engineering of this emergent and promising biocatalysts and  
111 other prokaryotic cell factories

## 112 2 Materials and Methods

### 113 2.1 Media and Growth Conditions

114 Liquid cultures were grown in a horizontal rotary shaker with a shaking frequency of 200 rpm and a  
115 throw of 50 mm in LB medium or LB medium supplemented with 5 g/L glucose and buffered with  
116 11.64 g/L  $K_2HPO_4$  and 4.89 g/L  $NaH_2PO_4$  (LB<sub>mod</sub>). *Pseudomonas* strains were grown at 30°C, whereas  
117 *E. coli* was grown at 37°C. Solid LB was prepared by adding 1.5 % (w/v) agar to the medium.  
118 Antibiotics were supplemented to the medium for plasmid maintenance and selection purposes.  
119 Kanamycin sulfate was added at a concentration of 50 mg/L for *Pseudomonas* and *E. coli*. Gentamycin

120 was used at a concentration of 25 mg/L for both species. Tetracycline was added only to solid media  
121 at a concentration of 30 mg/L for *Pseudomonas* and 10 mg/L for *E. coli*. To induce the pTN1 derived  
122 plasmids harboring the *nagR/PnagAa* promoter system controlling the expression of the fluorescent  
123 proteins or the acetoin pathway, 0.01 mM or 1 mM of sodium salicylate was added, respectively. The  
124 inducer isopropyl- $\beta$ -D-1 thiogalactopyranoside (IPTG) was used at a concentration of 1 mM to induce  
125 the P<sub>trc</sub> controlled constructs integrated into the *attTn7* site of *Pseudomonas* strains.

126 The acetoin producing strains were cultivated in airtight 500 mL serum flasks containing 50 mL of  
127 LB<sub>mod</sub> supplemented with gentamycin (see above). The main cultures were inoculated from an  
128 overnight pre-culture to an OD<sub>600</sub> of 0.1. The plasmid-based acetoin pathway genes were induced with  
129 sodium salicylate once the cultures reached an OD<sub>600</sub> of 1. Afterward, samples were collected for  
130 HPLC analysis.

131 The chemicals used were purchased from Merck (Darmstadt, Germany), Sigma-Aldrich (St. Louis,  
132 MO, USA) or Carl Roth (Karlsruhe, Germany) unless stated otherwise. Pharmaceutical grade glycerol  
133 was kindly provided by Bioeton (Kyritz, Germany).

## 134 2.2 Plasmid and strain construction

135 All plasmids were constructed through Gibson assembly (Gibson et al., 2009) using the NEBuilder  
136 HiFi DNA Assembly kit (New England Biolabs, Ipswich, MA, USA). Primers used in this study were  
137 purchased from Eurofins Genomics (Ebersberg, Germany) as unmodified DNA oligonucleotides. PCR  
138 amplification of DNA for cloning purposes was performed using the Q5 High-Fidelity Polymerase  
139 (New England Biolabs, Ipswich, MA, USA). All primers and plasmids are listed in the Supplementary  
140 Information Table S1. The genes *ilvB* (from *E. coli* K-12 MG1655, Uniprot P08142, with C83S  
141 mutation for improved Kcat/Km) and *aldB* (from *B. brevis*, Uniprot P23616) were codon-optimized  
142 for *P. taiwanensis* VLB120 using the online tool OPTIMIZER (Puigbo et al., 2007). Settings were as  
143 follows: genetic code, eubacterial; method, guided random; undesired restriction sites were manually  
144 excluded, and rare codons with less than 6% usage were avoided by manipulating the input codon  
145 usage table. Both codon-optimized genes and their corresponding optimized gene expression parts  
146 were ordered as synthetic DNA fragments from Thermo Fisher Scientific; the sequences can be found  
147 in the Supplementary Information A. The assembled plasmids were transformed into either NEB® 5-  
148 alpha chemically competent *E. coli* (New England Biolabs, Ipswich, MA, USA) or One Shot™ PIR2  
149 Chemically Competent *E. coli* (Thermo Fisher Scientific) cells through heat shock according to the  
150 supplier's protocol. Assembled plasmids were transformed into *P. taiwanensis* VLB120 by  
151 electroporation using a GenePulser Xcell (BioRad, Hercules, CA, USA) (settings: 2 mm cuvette gap,  
152 2.5 kV, 200  $\Omega$ , 25  $\mu$ F). For DNA integration into the *attTn7* locus, the mini-Tn7 delivery vector  
153 backbone developed by Zobel et al. (Zobel et al., 2015). was used and deployed through mating  
154 procedures. For mating events, the *E. coli* donor harboring the mini-Tn7 vector with the constructs to  
155 be integrated, the helper strain *E. coli* HB101 pRK2013, the *E. coli* DH5  $\lambda$ pir expressing the transpose  
156 operon *tnsABCD* and the recipient strain were streaked on top of each other on a LB agar plate and  
157 incubated at 30°C for 12-24 h. Further on, cell material was taken from the bacterial lawn, resuspended  
158 in 0.9 % (w/v) sodium chloride solution and plated on selective cetrimide agar plates. *E. coli* and  
159 *Pseudomonas* transformants were screened through colony PCR using the OneTaq 2 $\times$ Master Mix with  
160 standard buffer after lysing colony cell material in alkaline polyethylene glycol, as described by  
161 Chomczynski and Rymaszewski. (Chomczynski and Rymaszewski, 2006) Successful plasmid  
162 constructions and genome integrations were confirmed by Sanger sequencing performed by Eurofins  
163 Genomics. All strains and primers used in this work are shown in Table 1.

164 **Table 1.** Strains used in this study.

| Strain                      | Description                                                                                    | References                             |
|-----------------------------|------------------------------------------------------------------------------------------------|----------------------------------------|
| <i>E. coli</i>              |                                                                                                |                                        |
| DH5a                        | <i>supE44, ΔlacU169 (φ80lacZΔM15), hsdR17 (rK-mK +), recA1, endA1, gyrA96, thi-1, relA1</i>    | (Hanahan, 1985)                        |
| PIR2                        | F- <i>Δlac169 rpoS(Am) robA1 creC510 hsdR514 endA recA1 uidA(ΔMluI)::pir</i>                   | Thermo Scientific                      |
| HB101 pRK2013               | Sm <sup>R</sup> , <i>hsdR-M<sup>+</sup>, proA2, leuB6, thi-1, recA</i> ; bears plasmid pRK2013 | (Ditta et al., 1980)                   |
| DH5a pSW-2                  | DH5α bearing pSW-2                                                                             | (Martínez-García and de Lorenzo, 2011) |
| DH5αpir pTNS1               | DH5αpir bearing plasmid pTNS1                                                                  | (Martínez-García and de Lorenzo, 2011) |
| <i>P. taiwanensis</i>       |                                                                                                |                                        |
| VLB120                      | Wild type                                                                                      | (Panke et al., 1998)                   |
| VLB120 pTN1_Syn35_T_GFP     | bearing plasmid pTN1_SynPro35_Tra_GFP                                                          | This study                             |
| VLB120 pTN1_Syn35_O_GFP     | bearing plasmid pTN1_SynPro35_Opt_GFP                                                          | This study                             |
| VLB120 pTN1_Syn35_T_mCherry | bearing plasmid pTN1_SynPro35_Tra_mCherry                                                      | This study                             |
| VLB120 pTN1_Syn35_O_mCherry | bearing plasmid pTN1_SynPro35_Opt_mCherry                                                      | This study                             |
| VLB120 pTN1_Syn42_T_GFP     | bearing plasmid pTN1_SynPro42_Tra_GFP                                                          | This study                             |
| VLB120 pTN1_Syn42_O_GFP     | bearing plasmid pTN1_SynPro42_Opt_GFP                                                          | This study                             |
| VLB120 pTN1_Syn42_T_mCherry | bearing plasmid pTN1_SynPro42_Tra_mCherry                                                      | This study                             |
| VLB120 pTN1_Syn42_O_mCherry | bearing plasmid pTN1_SynPro42_Opt_mCherry                                                      | This study                             |
| VLB120 pTN1_SPA75_T_GFP     | bearing plasmid pTN1_SPA75_Tra_GFP                                                             | This study                             |
| VLB120 pTN1_SPA75_O_GFP     | bearing plasmid pTN1_SPA75_Opt_GFP                                                             | This study                             |
| VLB120 pTN1_SPA75_T_mCherry | bearing plasmid pTN1_SPA75_Tra_mCherry                                                         | This study                             |
| VLB120 pTN1_SPA75_O_mCherry | bearing plasmid pTN1_SPA75_Opt_mCherry                                                         | This study                             |
| VLB120 pTN1_nagR_T_GFP      | bearing plasmid pTN1_nagR_Tra_GFP                                                              | This study                             |
| VLB120 pTN1_nagR_O_GFP      | bearing plasmid pTN1_nagR_Opt_GFP                                                              | This study                             |
| VLB120 pTN1_nagR_T_mCherry  | bearing plasmid pTN1_nagR_Tra_mCherry                                                          | This study                             |
| VLB120 pTN1_nagR_O_mCherry  | bearing plasmid pTN1_nagR_Opt_mCherry                                                          | This study                             |
| VLB120 attTn7::IPTG_T_GFP   | <i>attTn7::tetA_IPTG_Tra_GFP</i>                                                               | This study                             |
| VLB120 attTn7::IPTG_O_GFP   | <i>attTn7::tetA_IPTG_Opt_GFP</i>                                                               | This study                             |
| VLB120 pTN1_nagR_T_acetoin  | bearing plasmid pTN1_nagR_Tra_ilvB_aldB                                                        | This study                             |
| VLB120 pTN1_nagR_O_acetoin  | bearing plasmid pTN1_nagR_Opt_ilvB_aldB                                                        | This study                             |

### 165 2.3 Gravimetric cell dry weight determination

166 Overnight cultures of *P. taiwanensis* VLB120 were diluted to pre-established optical densities and  
 167 filtered through membrane filters with a pore size of 0.2 μM which were previously weighted ( $w_0$ )  
 168 after being dried in a microwave for 3 min at 350 W. The filter cake was washed three times with  
 169 distilled water, dried in the microwave for 8 min at 350 W and cooled down in a desiccator before  
 170 weighing ( $w_1$ ). The cell dry weight (CDW) was calculated by subtracting  $w_0$  from  $w_1$  and divided by  
 171 the volume of the filtered suspensions. 190 μL of the same cell suspensions were transferred to a 96-  
 172 well microtiter plate (Greiner Bio One), and scattered light signals were recorded at 620 nm with a

173 gain of 30. Linear regression between the CDW and scattered light signals of the pre-established cell  
174 suspensions retrieved the conversion factor between these two units.

## 175 2.4 Fluorescent measurements

176 All *Pseudomonas* strains expressing fluorescent reporter proteins were characterized in the  
177 microbioreactor system BioLector (m2p-labs, Baesweiler, Germany). Cultivations were performed at  
178 30°C with a shaking frequency of 900 rpm and 85 % humidity in a 96-well microtiter plate (Greiner  
179 Bio One) containing 190  $\mu$ L of LB media supplemented with required antibiotics for plasmid  
180 maintenance and sealed with evaporation reducing foil (Greiner Bio One). The main cultures were  
181 inoculated from an overnight pre-culture to an OD<sub>600</sub> of 0.1. Growth was measured through scattered  
182 light signal at 620 nm with a gain of 30, msfGFP fluorescence was excited at 485 nm and emission  
183 was measured at 520 nm. The measurements were performed with gains of 50 and 70 due to signal  
184 overflow of the stronger constructs. mCherry fluorescence was excited at 580 nm, and emission was  
185 measured at 610 nm with a gain of 100. Scattered light values were converted into cell dry weight  
186 concentrations with a predetermined calibration curve. Inducer was added to the cultures during the  
187 early exponential growth phase. To allow comparison of fluorescence values recorded with different  
188 gains, the msfGFP signals were converted into  $\mu$ M units of fluorescein, which was dissolved in 100  
189 mM boric acid (See Supplementary information B for the calibration curves). Biological triplicates  
190 were performed, and errors presented as the standard deviation of the mean.

## 191 2.5 qPCR assays for mRNA stability assessment

192 Biological triplicates from *P. taiwanensis* VLB120 harboring either the plasmid  
193 pTN1\_SPA75\_Tra\_GFP or pTN1\_SPA75\_Opt\_GFP were grown overnight in LB<sub>mod</sub> supplemented  
194 with 25 mg/mL gentamycin from a glycerol stock. On the following day, the main cultures with the  
195 same medium were inoculated to an initial OD<sub>600</sub> of 0.1. Once the cultures reached an OD of 1, 1  
196 mg/mL rifampicin and 40  $\mu$ g/mL nalidixic acid were added simultaneously to cease DNA replication  
197 and transcription, respectively. 2 mL samples were retrieved, centrifuged, and cell pellets flash-frozen  
198 in liquid nitrogen and stored at -80°C until further sample treatment. Cell pellets were suspended in  
199 800  $\mu$ L of DNA/RNA protecting buffer from the Monarch Total RNA MiniPrep kit (New England  
200 Biolabs, Ipswich, MA, USA), transferred into the ZR S6012-50 Bashing beads lysis tubes (Zymo  
201 Research, Irvine, CA, USA), and mechanically disrupted for 1 min. The lysate was transferred into a  
202 fresh reaction tube and centrifuged for 2 min at 13,000 rpm. The supernatant was transferred into a  
203 fresh tube, and the protocol proceeded as described in the Monarch Total RNA MiniPrep kit. qPCR  
204 experiments with *msfGFP* and *rpoB* primers pairs were performed with 1  $\mu$ L of each RNA sample to  
205 confirm that the samples were not contaminated with either genomic or plasmid DNA. 80 ng of RNA  
206 of each sample was converted into cDNA using the LunaScript RT SuperMix kit (New England  
207 Biolabs, Ipswich, MA, USA). qPCR experiments were performed with the Luna Universal qPCR  
208 Master Mix (New England Biolabs, Ipswich, MA, USA). Primer pairs efficiencies for the  
209 housekeeping gene *rpoB* and target gene *msfGFP* can be seen in Supplementary Information C. qPCR  
210 of samples was performed with 1  $\mu$ L of the reverse transcription reaction mixtures. The qPCR was  
211 performed with the CFX96 Real-Time PCR Detection System (Biorad, Hercules, CA, USA). qPCR  
212 reactions were performed in technical triplicates. Absolute amounts of mRNA transcripts of *msfGFP*  
213 and *rpoB* were quantified using the linear calibration curves used for primer pairs efficiencies, which  
214 were constructed with either the plasmid harboring the traditional *msfGFP* expression cassette under  
215 the control of the SPA75 or genomic DNA, respectively. The data was analyzed with the Bio-Rad CFX  
216 Manager and Microsoft Excel software. As we normalized the *msfGFP* mRNA abundance data with  
217 the transcript abundance of the housekeeping gene *rpoB*, the determination of an absolute decay rate

218 for the *msfGFP* mRNA was not possible. We calculated the delta between the decay rates of the  
219 *msfGFP* and *rpoB* mRNA instead. Assuming a first-order degradation kinetic for the mRNA of both  
220 genes, the time profile of the normalized mRNA data can be described with Equation 1.

$$\begin{aligned} 221 \quad \frac{mRNA_{mfsGFP}(t)}{mRNA_{rpoB}(t)} &= \frac{mRNA_{mfsGFP,0} \cdot \exp^{k_{mfsGFP} \cdot t}}{mRNA_{rpoB,0} \cdot \exp^{k_{rpoB} \cdot t}} \\ 222 \quad &= \frac{mRNA_{mfsGFP,0}}{mRNA_{rpoB,0}} \cdot \exp^{(k_{rpoB} - k_{mfsGFP}) \cdot t} \quad (Eq. 1) \end{aligned}$$

223 A nonlinear least square algorithm was used in Matlab (The MathWorks Inc., Natick, MA, USA) to fit  
224 the experimental data to Equation 1 and to determine the difference in the decay rates of the *rpoB* and  
225 the *mfsGFP* gene.

## 226 2.6 Analytical methods

227 The samples taken during the acetoin producing cultivations were centrifuged at 13,000 rpm for  
228 1 minute, and the supernatant was stored at -20°C until further analysis. To follow the consumption of  
229 glucose and production of acetoin, a Beckman System Gold 126 Solvent Module with an organic acid  
230 resin column (Polystyrene divinylbenzene copolymer (PS DVB), 300 x 8.0 mm, CS-Chromatographie)  
231 was used with 5 mM H<sub>2</sub>SO<sub>4</sub> as eluent at a flow of 0.6 mL h<sup>-1</sup> for 30 minutes at 30°C. Detection was  
232 realized with a System Gold 166 UV detector (Beckman Coulter) and a Smartline RI Detector 2300  
233 (KNAUER Wissenschaftliche Geräte, Berlin, Germany).

## 234 3 Results and Discussion

### 235 3.1 Characterization of plasmid-based, constitutive fluorescent protein expression

236 The optimal gene expression profile depends on the specific application. Generally, the use of robust,  
237 constitutive promoters is prioritized over inducible promoters for large-scale production as

238 they render the addition of inducers unnecessary and therefore contribute the cost efficiency of  
239 microbial fermentations. To evaluate the impact and applicability of the consolidated, optimized  
240 expression architecture on this type of promoters, we selected two synthetic promoters, Syn42 and  
241 Syn35, created by Zobel et al. (originally referred to as BG42 and BG35, respectively), whereas the  
242 third one, SPA75, was obtained from a synthetic promoter library created by Neves and Liebal et al.  
243 (manuscript in preparation) (Zobel et al., 2015). The promoters Syn42 and SPA75 possess a rather  
244 similar and high expression strength in *P. taiwanensis* VLB120, while the promoter Syn35 exhibits  
245 around 25% of the expression strength of Syn42. These promoters were encompassed within the  
246 optimized and traditional gene expression cassette in the pTN1 plasmid backbone, a vector used by the  
247 *Pseudomonas* scientific community (Figure 2 A) (Schmitz et al., 2015; Verhoef et al., 2009; Wierckx  
248 et al., 2005). The optimized gene expression cassette was framed between two bidirectional terminators  
249 to uncouple transcription from its genetic context. For this purpose, two bidirectional terminators  
250 characterized by Chen et al., ECK120026481 and ECK120011170, were selected to insulate,  
251 respectively, the 5' and 3' end of the optimized gene expression cassette (Chen et al., 2013). The  
252 ribozyme RiboJ, characterized by Lou et al., and the bicistronic design BCD2, developed by Mutalik  
253 et al., were placed downstream of the selected promoters (Lou et al., 2012; Mutalik et al., 2013). The  
254 last genetic part included was the RNase III site R1.1, characterized by Cambray et al., and placed  
255 downstream of the GOI (Cambray et al., 2013). The traditional versions of the gene expression  
256 cassettes were obtained by omitting the enhancing genetic parts and including the 2<sup>nd</sup> RBS of the BCD2

257 to maintain the ribosome affinity towards the mRNA between the two expression systems (Figure 2  
258 A).

259 The twelve constructs were evaluated in microtiter plate cultivations with online measurements of  
260 fluorescence and scattered light. The scattered light values were converted into cell dry weight units,  
261 whereas the arbitrary *msfGFP* fluorescence units were transformed into equivalents of fluorescein  
262 ( $\mu\text{M}$ ) to allow a direct comparison between experiments ran with different measurement settings. The  
263 *mCherry* fluorescence values were not converted since all experiments were performed with the same  
264 settings. However, we propose the broad implementation of such standardized fluorescence units to  
265 facilitate results comparison within the scientific community. Gene expression with the different  
266 constructs was characterized by the slope of the linear regression between measured fluorescence and  
267 cell dry weight, which indicates a specific expression strength.

268 All optimized gene expression constructs with the three tested constitutive promoters resulted in a  
269 substantial increase in fluorescence compared with their traditional counterparts (Figure 3 A).  
270 While the ranking of the promoter strength was maintained with the optimized gene expression  
271 cassettes, absolute differences in the level of expression were reduced as a much higher increase was  
272 observed for the weaker Syn35 promoter expressing mCherry (Table 2). The lower fold increase in  
273 expression strength for the strong promoters suggests that the full potential of the optimized gene  
274 expression cassette is not reached here because of other cellular limitations, such as RNA polymerase  
275 availability.

276 In a recent study by Clifton et al.(Clifton et al., 2018) fluorescent protein expression in constructs  
277 harboring a RiboJ was evaluated using 24 different, constitutive promoters covering a broad spectrum  
278 of expression strength. Specific fluorescence values were not reported prohibiting a direct comparison  
279 with our results. Based on the absolute GFP fluorescence values, however, no strong correlation  
280 between protein expression and promoter strength was observed.

281 **Table 2.** Pairwise fold-changes of specific fluorescence (fluorescence per g cell dry weight) between  
282 the optimized and traditional gene expression cassettes calculated as described by Clifton et al (Clifton  
283 et al., 2018).

| Expression System | pTN1 plasmid |         |         |                    | -attTn7::<br><i>lacI<sup>Q</sup>/P<sub>Trc</sub></i> |
|-------------------|--------------|---------|---------|--------------------|------------------------------------------------------|
|                   | Syn35        | Syn42   | SPA75   | <i>nagR/PnagAa</i> |                                                      |
| <i>msfGFP</i>     | 8.7±1.6      | 5.0±0.9 | 3.9±0.3 | 4.1±0.7            | 14.7±1.6                                             |
| <i>mCherry</i>    | 11.3±3.8     | 3.8±0.2 | 2.9±0.4 | 3.9±0.7            | -                                                    |



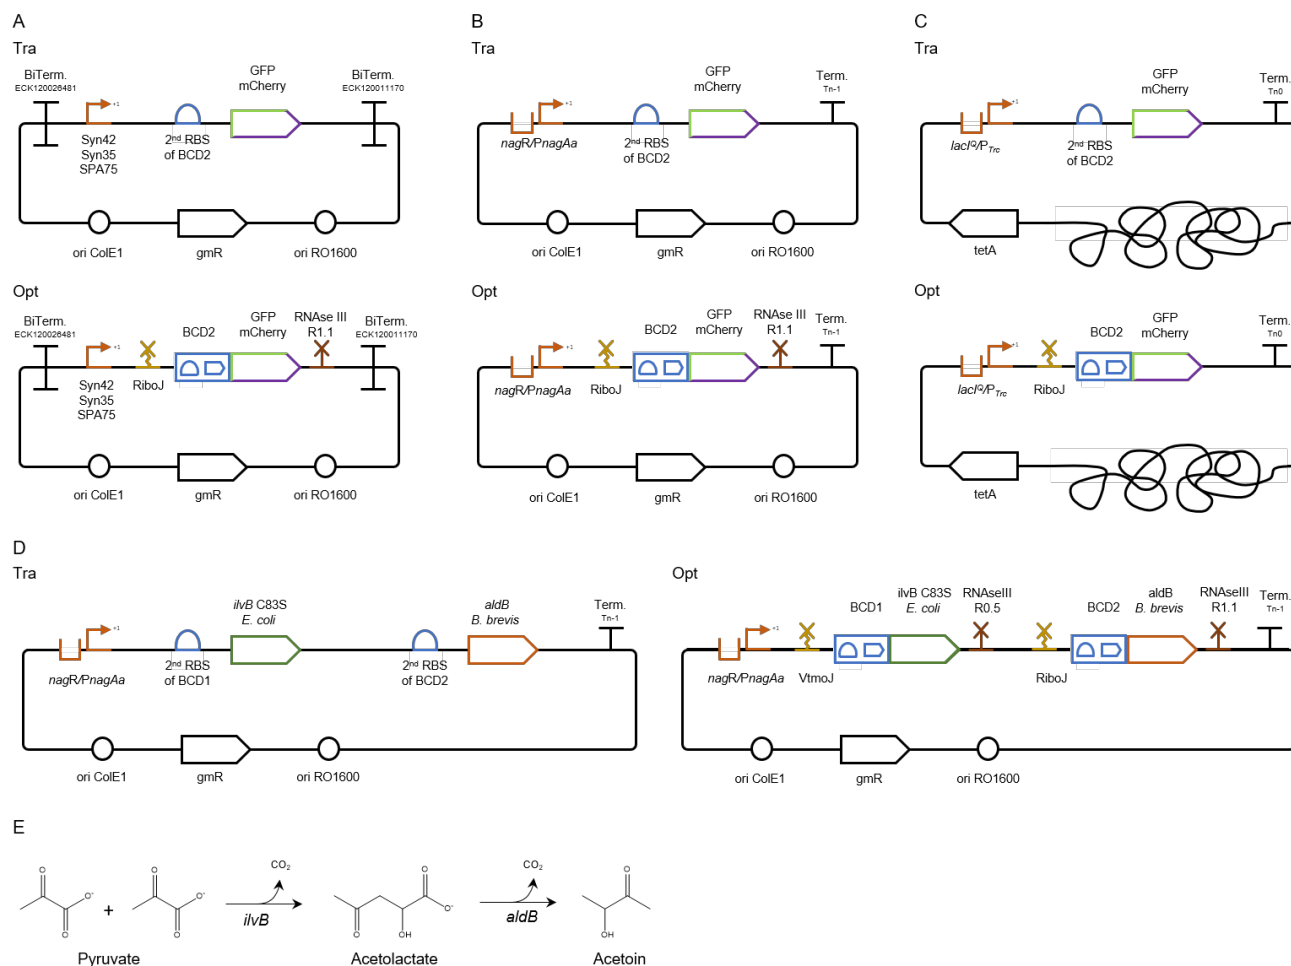

284

285 **Figure 2.** Gene expression constructs evaluated within this work. Traditional and optimized gene  
 286 expression cassettes for (A) the plasmid-based evaluation of the expression of two fluorescent reporters  
 287 (msfGFP and mCherry) under the control of three constitutive promoters (Syn42, Syn35, and SPA75)  
 288 and (B) the salicylate inducible PnagAa promoter; (C) Traditional and optimized gene expression  
 289 cassettes for single genomic integration into the attTn7 site. The expression with these constructs was  
 290 evaluated using the fluorescent reporter msfGFP under the control of the IPTG inducible PTrc  
 291 promoter; (D) traditional and optimized gene expression cassettes for the plasmid-based evaluation of  
 292 an acetoin pathway under the control of the salicylate inducible PnagAa promoter, (E) acetoin pathway  
 293 comprising the C83S ilvB mutant from *E. coli* and aldB from *Brevibacillus brevis*; Tra, traditional gene  
 294 expression cassette; Opt, optimized gene expression cassette; RBS, ribosomal binding site; Bi. term.,  
 295 bidirectional terminator; BCD, bicistronic design; VtmoJ, RiboJ, synthetic ribozyme; RNaseIII R1.1  
 296 and R0.5, RNase III restriction sites; gmR, gentamycin resistance gene; tetA, tetracycline resistance  
 297 gene; ori ColE1 and ori RO1600, origins of replication.

### 298 3.2 Characterization of plasmid-based, inducible fluorescent protein expression

299 Controlled gene expression is required, for instance, when the synthesis of a target product harms cell  
 300 fitness and needs to be decoupled from growth or in genetic circuits (Chen, 2012; Jusiak et al., 2016;  
 301 Terpe, 2006; Voigt, 2006). We, therefore, chose to further evaluate inducible gene expression by  
 302 placing the two fluorescent reporter proteins under control of the nagR/PnagAa promoter, inducible  
 303 with low concentrations of the relatively cheap inducer salicylate (Hüsken et al., 2001). In both, the  
 304 traditional and optimized expression constructs, the bidirectional terminators were left out as the first

305 attempt to reduce the overall size of the cassette. The removal of the bidirectional terminators should  
306 bear similar effects in both cassettes as they have the identical genetic context. Aside from the removal  
307 of the bidirectional terminators and the use of a different promoter, both expression cassettes contained  
308 the equal genetic parts used for the evaluation of the constitutive promoters (Figure 2 B).  
309 Under the control of the inducible *nagR/PnagAa* promoter, the optimized gene expression cassette  
310 showed a similar behavior as with the strong constitutive promoters. The specific fluorescence was  
311 increased by 4-fold with the optimized gene expression cassette in comparison to their respective  
312 traditional counterparts (Figure 3 B). A similar increase was observed for the msfGFP signal under  
313 non-induced conditions whereas for the mCherry constructs only a 2-fold increase was observed. The  
314 stable increase of the msfGFP signal under both induced and uninduced conditions supports the concept  
315 of a post-transcriptional gene expression enhancement. The lower fold ratio in the non-induced  
316 conditions observed with the mCherry constructs could be related to analytical inaccuracies of the  
317 weaker mCherry signal. Inducible promoters, such as the *nagR/PnagAa* promoter system used in this  
318 work, tend to have a basal expression which could become problematic for the expression of toxic  
319 genes or their use in systems that need to be tightly regulated, *e. g.*, genetic circuits. Attempts to achieve  
320 non-leaky inducible expression systems have been made, but their number continues to be limited  
321 (Horbal and Luzhetskyy, 2016). We propose the use of the optimized gene expression cassette in  
322 known non-leaky inducible promoter setups to increase the available expression range in such systems  
323 rather than aiming to engineer a novel non-leaky inducible variant. Since the additional parts of the  
324 optimized gene expression cassette tend to act on transcribed mRNA only, an optimized gene  
325 expression cassette harboring a tight, inducible promoter system could still exhibit the desired non-  
326 basal expression in the absence of the inducer and, once induced, reach higher expression levels than  
327 the standard counterpart.

### 328 **3.3 Characterization of inducible fluorescence expression of single, genome-integrated** 329 **constructs**

330 Genomic integration is generally preferred over plasmid-based expression when it comes to the stable  
331 construction of cell factories. Integrating the pathways into the genome grants higher genetic stability  
332 since it avoids common plasmid-based expression issues such as plasmid segregation and copy number  
333 variability (Jahn et al., 2014; Lindmeyer et al., 2015), plasmid replication-related growth impairment  
334 (Mi et al., 2016), and antibiotic dependency. However, genomic integration possesses specific  
335 disadvantages like generally significantly lower expression levels and a limited number of  
336 characterized integration sites (Otto et al., 2019). A common approach to overcome the low expression  
337 levels of single genomic integration is to directly or randomly integrate the desired expression cassette  
338 at multiple sites. However, the directed multiple integration procedure is laborious and limited by the  
339 number of characterized integration sites, whereas random integration requires high-throughput  
340 screening. As we had seen a significant increase in expression strength with the optimized cassettes  
341 located on a plasmid, we argued that this device might also be valuable to boost the output of genome-  
342 integrated constructs. To evaluate if the optimized gene expression cassette could relief the low  
343 expression limitation of genomic integrations, single genomic integration cassettes expressing msfGFP  
344 were constructed and integrated at the neutral *attTn7* site.  
345 Further reduction of the optimized gene expression cassette was attempted by removing the RNase III  
346 site. As the RNase III site does not exert a gene expression enhancement function but rather contributes  
347 to its standardization, negative impact on gene expression should not be anticipated with this omission.

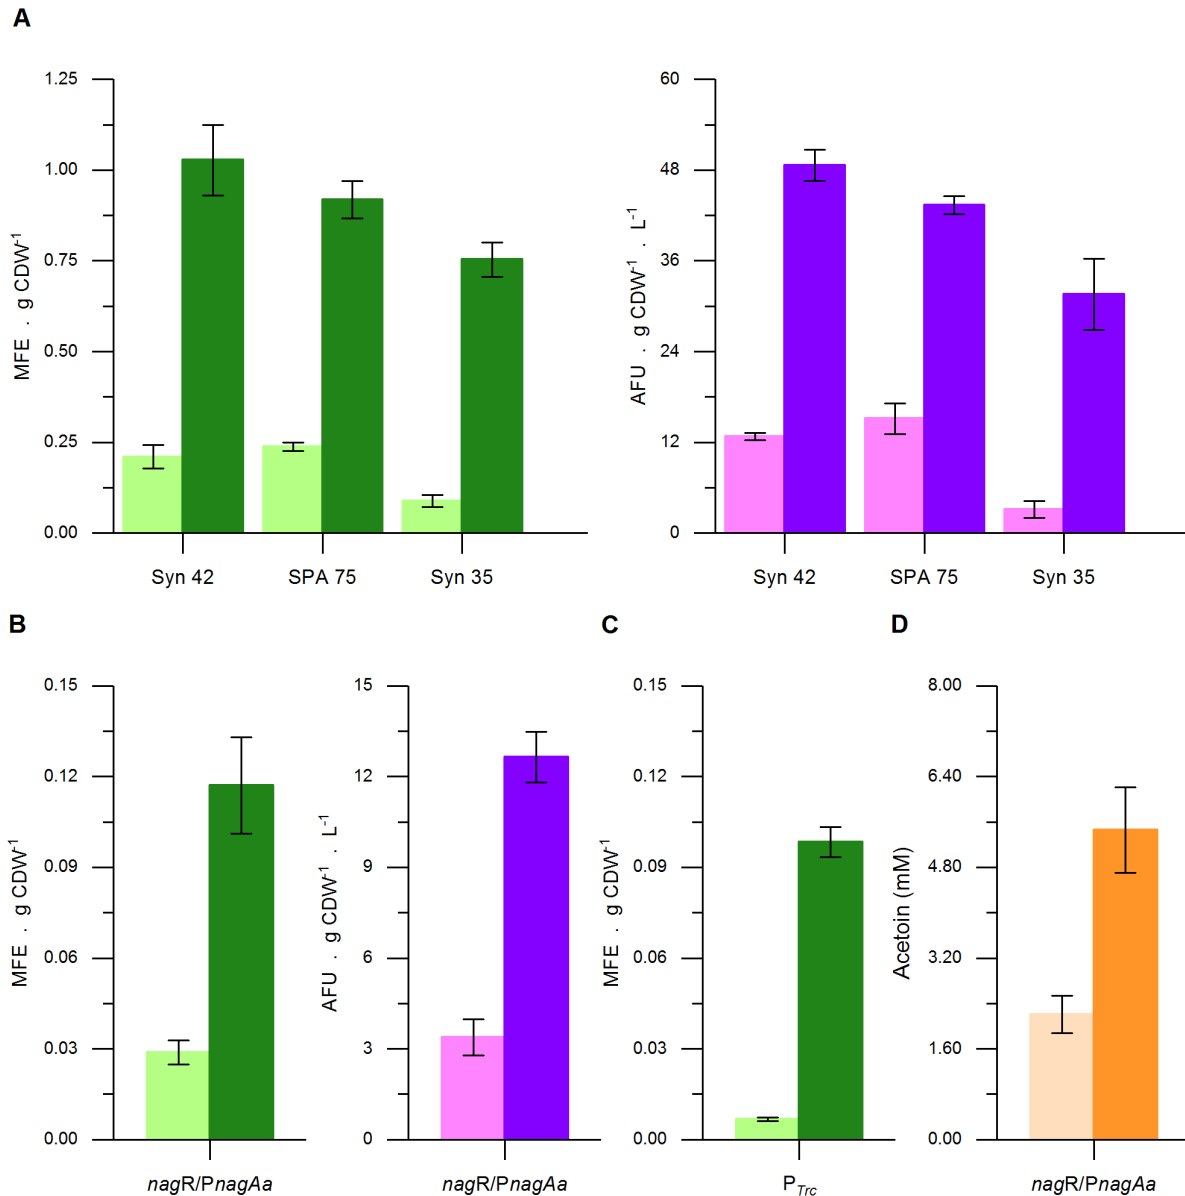

348

349 **Figure 3.** Evaluation of the developed gene expression constructs: plasmid-based expression of  
 350 msfGFP (green) and mCherry (pink) with the traditional (light-colored) or optimized (dark-colored)  
 351 expression cassette employing (A) constitutive and (B) the inducible *PnagAa* promoter, (C) mfsGFP  
 352 expression under the control of the inducible P<sub>Trc</sub> promoter from single copies of the traditional and  
 353 optimized gene expression cassettes integrated into the *attTn7* site, (D) plasmid-based expression of  
 354 an acetoin pathway under the control of the inducible *PnagAa* promoter employing a traditional and an  
 355 optimized expression cassette Error bars indicate the standard deviation of three biological replicates  
 356 except for the inducible *nagR/PnagAa* construct expressing mCherry in which biological duplicates  
 357 are represented. CDW, cell dry weight. Abbreviations: MFE,  $\mu$ moles of fluorescein equivalents; AFU,  
 358 arbitrary fluorescence units.

359 To expand the promoter scope further, the standard LacI-repressed P<sub>Trc</sub> promoter was chosen to drive  
 360 the gene expression of the genome integrated cassettes. As in the plasmid-based evaluations, the  
 361 optimized gene expression cassette harbored the RiboJ and BCD2, whereas the traditional version

362 contained the 2<sup>nd</sup> RBS of the BCD2 (Figure 2 C). Introducing this optimized gene expression cassette  
363 in the single genomic *attTn7* locus yielded a ca. 15-fold expression increase in comparison to the  
364 traditional analog, the highest fold increase observed in this work (Figure 3 C). Even though RNase  
365 III is not the major endoribonuclease responsible for mRNA turnover in bacteria, the enzyme does  
366 contribute to mRNA degradation.(Deutscher, 2006) By removing the RNase III site from the  
367 optimized gene expression cassette, an mRNA degradation target was abolished, which might have  
368 resulted in an increased half-life of the transcripts and consequently higher expression levels. The  
369 single, genome-integrated optimized expression cassette achieved expression levels of  $0.098 \pm 0.005$   
370  $\mu\text{mol fluorescein g}^{-1}$  cell dry weight (CDW), an expression strength in the range of the plasmid-based  
371 optimized cassette under the control of the inducible promoter *nagR/PnagAa* or the constitutive  
372 promoter Syn35 within the traditional cassette. Although the use of different promoters does not allow  
373 a fair comparison, it is still noteworthy to state that expression levels were achieved with the single  
374 genomic integration cassette, which are usually seen for episomally expressed genes.

### 375 **3.4 Evaluation of a recombinant acetoin production pathway employing the optimized** 376 **expression cassette**

377 Finally, a heterologous acetoin pathway was framed within the pTN1 plasmid backbone to further  
378 evaluate the optimized expression cassette in a production context. The acetoin pathway included a  
379 C83S mutant of the *E. coli* K-12 MG1655 acetolactate synthase (*ilvB*) and an acetolactate  
380 decarboxylase (*aldB*) from *Brevibacillus brevis* (Figure 2 E). The *E. coli ilvB* C83S mutant was chosen  
381 due to its 4-fold lower  $K_m$  and 126% higher  $K_{cat}/K_m$  ratio compared with the wild type, making it  
382 one of the most efficient enzymes of this class so far characterized (Belenky et al., 2012). The *B. brevis*  
383 *aldB* was selected based on its low  $K_m$  value (B. Rostgaard et al., 1987). In the polycistronic design,  
384 expression of both genes was driven by the inducible *nagR/PnagAa* promoter system while each gene  
385 was framed with a ribozyme, a bicistronic design version, and an RNase III site. The acetolactate  
386 synthase was framed within the VtmoJ ribozyme gene, the BCD1 bicistronic design, and the RNase  
387 III R0.5 site whereas the acetolactate decarboxylase was surrounded with the RiboJ ribozyme gene,  
388 the BCD2 bicistronic design, and the RNase III R1.1 site (Figure 2 D). The traditional expression  
389 cassette was obtained by removing the expression enhancing genetic parts while maintaining the 2<sup>nd</sup>  
390 RBS of BCD1 upstream of the *ilvB* and the 2<sup>nd</sup> RBS of BCD2 upstream of the *aldB* (Figure 2 D).

391 Employing the optimized gene expression architecture to the acetoin pathway led to an acetoin  
392 accumulation of  $5.5 \pm 0.76$  mM, representing a 2.5-fold production increase when compared to the  
393 traditional counterpart (Figure 3 C). The increase of acetoin production solely using the optimized gene  
394 expression cassette shows that its use can be extended to production contexts. The optimized gene  
395 expression cassette could be advantageous for metabolic engineering approaches where high gene  
396 expression is required, such as redirecting native metabolites to the desired production pathway or for  
397 enzyme production for *in vitro* applications.

### 398 **3.5 qPCR based elucidation of mRNA stability**

399 The high fluorescence expression levels and increased acetoin production achieved by the optimized  
400 gene expression in this work arose from the combination of mRNA stabilizing and translation boosting  
401 genetic parts. Lou et al. integrated hairpins in both ribozymes used in this work, RiboJ and VtmoJ, to  
402 expose the RBS and confirmed their catalytic functionality through rapid amplification of cDNA 5'-  
403 ends.(Lou et al., 2012) The presence of such hairpins in the 5'UTR region was reported to increase the  
404 respective mRNA half-life, which leads to higher protein production.(Viegas et al., 2018) To evaluate  
405 if such a phenomenon occurred in the optimized gene expression cassette, qPCR assays were  
406 performed to compare the decay rates of the transcripts. For this purpose, cultivations of the strains

407 expressing *msfGFP* under the control of the SPA75 promoter were treated with rifampicin and nalidixic  
408 acid in the early exponential growth phase, and mRNA samples were retrieved over time. The addition  
409 of rifampicin inhibits bacterial RNA polymerase, whereas nalidixic acid inhibits a subunit of the DNA  
410 gyrase and topoisomerase. As the mRNA abundance data of the *msfGFP* were normalized with the  
411 data of the housekeeping gene *rpoB* to cancel out small differences in the template concentration, the  
412 determination of the absolute decay rate of the *msfGFP* transcript was not possible. Instead, we  
413 calculated the difference between the decay rates of the *rpoB* and the *msfGFP* mRNA (i.e.,  $k_{rpoB} -$   
414  $k_{msfGFP}$ , with  $k$  being the decay rate). Given that the *rpoB* mRNA decay should be equal in both strains  
415 the delta can be used to reveal a possible difference in the *msfGFP* decay rates in the optimized and  
416 traditional expression architecture. As hypothesized, the data was significantly higher for the optimized  
417 construct (1.6-fold), which translates to a reduced decay rate of the *msfGFP* transcript (Figure 4).

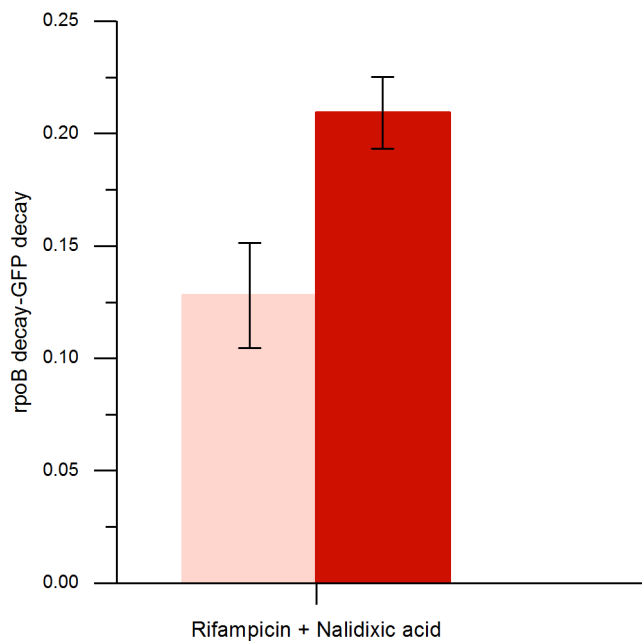

418

419 **Figure 4.** qPCR based elucidation of mRNA stability of *msfGFP* transcripts from the plasmid-based  
420 traditional (light-colored) and optimized (dark-colored) expression cassettes harboring the constitutive  
421 SPA75 promoter. Early exponential cultivations were treated with the antibiotics, nalidixic acid and  
422 rifampicin, to halt DNA replication and transcription, respectively. Samples were taken over time, and  
423 mRNA levels were assessed through qPCR. mRNA decay rates of transcripts from each expression  
424 cassette were retrieved through the difference between the decay rate of the housekeeping gene *rpoB*  
425 and the target *msfGFP*. Error bars indicate the standard deviation of two biological replicates.

426 Hence, higher mRNA stability is indeed one factor contributing to the observed increase in  
427 fluorescence output and acetoin production.

#### 428 4 Conclusion

429 In this study, the optimized gene expression cassette architecture proposed by Nielsen et al. was  
430 evaluated in *P. taiwanensis* VLB120 for the expression of fluorescent reporter genes and a 2-step  
431 acetoin biosynthesis operon. The optimized gene expression cassette was characterized on a plasmid  
432 or single genomic integration basis with either constitutive or inducible promoters to cover all  
433 commonly used expression approaches in metabolic engineering. In all evaluations, the optimized gene

434 expression cassette outperformed its traditional counterpart. The highest improvement fold was  
435 observed once the RNase III site was removed and evaluated on a single genomic integration basis  
436 under the control of the IPTG inducible  $P_{Trc}$  promoter. Such a boost allowed a single genomic  
437 integration-based expression to achieve expression levels commonly reached with plasmids. Within  
438 the constitutive promoter paradigm, the optimized gene expression cassette increased expression levels  
439 of the strongest promoter of a promoter library, showing that this tool could be used to extend  
440 expression ranges further. The mRNA transcripts retrieved by the optimized gene expression cassette  
441 harnessed higher stability than the transcripts from the traditional counterpart, validating that mRNA  
442 stability contributed to the observed results. This work demonstrates the applicability of the optimized  
443 gene expression cassette as a tool to achieve high gene expression levels through transcription-  
444 independent approaches that rely on mRNA stability and translation efficiency.

## 445 **5 Acknowledgments**

446 We thank Maike Otto and Nick Wierckx for valuable discussions.

## 447 **6 Supplementary material**

448 Primers, annotated sequences of ordered DNA fragments, conversion of Biolector fluorescence a.u.  
449 into  $\mu\text{M}$  fluorescein and qPCR primer pair efficiencies can be found in the supplementary material.

## 450 **7 Author Contributions**

451 DN and BEE conceived the study with the help of LMB. BEE and LMB supervised the study. DN  
452 performed all experiments with the support of SV. All authors analyzed the data. All authors have  
453 approved the final version of the manuscript.

## 454 **8 Funding**

455 This study has been conducted within the ERA SynBio project SynPath (Grant ID 031A459) with the  
456 financial support of the German Federal Ministry of Education and Research.

## 457 **9 Conflict of Interest**

458 The authors declare that the research was conducted in the absence of any commercial or financial  
459 relationships that could be construed as a potential conflict of interest.

## 460 **10 References**

- 461 B. Rostgaard, J., Svendsen, I., and Oitese, M. (1987). Isolation and characterization of an alpha-  
462 acetolactate decarboxylase useful for accelerated beer maturation. in *Journal of the Institute of*  
463 *Brewing* (Institute of Brewing 33 Clarges Street, London, England W1Y 8EE), 160.
- 464 Belenky, I., Steinmetz, A., Vyazmensky, M., Barak, Z., Tittmann, K., and Chipman, D. M. (2012).  
465 Many of the functional differences between acetohydroxyacid synthase (AHAS) isozyme I and  
466 other AHASs are a result of the rapid formation and breakdown of the covalent acetolactate-  
467 thiamin diphosphate adduct in AHAS I. *FEBS J.* 279, 1967–1979. doi:10.1111/j.1742-  
468 4658.2012.08577.x.
- 469 Borkowski, O., Ceroni, F., Stan, G. B., and Ellis, T. (2016). Overloaded and stressed: whole-cell

- 470 considerations for bacterial synthetic biology. *Curr. Opin. Microbiol.* 33, 123–130.  
471 doi:10.1016/j.mib.2016.07.009.
- 472 Cambray, G., Guimaraes, J. C., Mutalik, V. K., Lam, C., Mai, Q. A., Thimmaiah, T., et al. (2013).  
473 Measurement and modeling of intrinsic transcription terminators. *Nucleic Acids Res.* 41, 5139–  
474 5148. doi:10.1093/nar/gkt163.
- 475 Carneiro, S., Ferreira, E. C., and Rocha, I. (2013). Metabolic responses to recombinant bioprocesses  
476 in *Escherichia coli*. *J. Biotechnol.* 164, 396–408. doi:10.1016/j.jbiotec.2012.08.026.
- 477 Carrier, T. A., and Keasling, J. D. (1997). Engineering mRNA stability in *E. coli* by the addition of  
478 synthetic hairpins using a 5' cassette system. *Biotechnol. Bioeng.* 55, 577–580.  
479 doi:10.1002/(SICI)1097-0290(19970805)55:3<577::AID-BIT16>3.0.CO;2-D.
- 480 Chen, R. (2012). Bacterial expression systems for recombinant protein production: *E. coli* and beyond.  
481 *Biotechnol. Adv.* 30, 1102–1107. doi:10.1016/j.biotechadv.2011.09.013.
- 482 Chen, Y.-J., Liu, P., Nielsen, A. A. K., Brophy, J. A. N., Clancy, K., Peterson, T., et al. (2013).  
483 Characterization of 582 natural and synthetic terminators and quantification of their design  
484 constraints. *Nat. Methods* 10, 659–664. doi:10.1038/nmeth.2515.
- 485 Chomczynski, P., and Rymaszewski, M. (2006). Alkaline polyethylene glycol-based method for direct  
486 PCR from bacteria, eukaryotic tissue samples, and whole blood. *Biotechniques* 40, 454–458.  
487 doi:10.2144/000112149.
- 488 Clifton, K. P., Jones, E. M., Paudel, S., Marken, J. P., Monette, C. E., Halleran, A. D., et al. (2018).  
489 The genetic insulator RiboJ increases expression of insulated genes. *J. Biol. Eng.* 12, 23.  
490 doi:10.1186/s13036-018-0115-6.
- 491 Davy, A. M., Kildegaard, H. F., and Andersen, M. R. (2017). Cell Factory Engineering. *Cell Syst.* 4,  
492 262–275. doi:10.1016/j.cels.2017.02.010.
- 493 Deutscher, M. P. (2006). Degradation of RNA in bacteria: Comparison of mRNA and stable RNA.  
494 *Nucleic Acids Res.* 34, 659–666. doi:10.1093/nar/gkj472.
- 495 Ditta, G., Stanfield, S., Corbin, D., and Helinski, D. R. (1980). Broad host range DNA cloning system  
496 for gram-negative bacteria: construction of a gene bank of *Rhizobium meliloti*. *Proc. Natl. Acad.*  
497 *Sci.* 77, 7347–7351. doi:10.1073/pnas.77.12.7347.
- 498 Gibson, D. G., Young, L., Chuang, R. Y., Venter, J. C., Hutchison, C. A., and Smith, H. O. (2009).  
499 Enzymatic assembly of DNA molecules up to several hundred kilobases. *Nat. Methods* 6, 343–  
500 345. doi:10.1038/nmeth.1318.
- 501 Hanahan, D. (1985). Techniques for transformation of *E. coli*. *DNA cloning a Pract. approach* 1, 109–  
502 135. Available at: <http://ci.nii.ac.jp/naid/10004787690/en/> [Accessed September 25, 2018].
- 503 Horbal, L., and Luzhetskyy, A. (2016). Dual control system - A novel scaffolding architecture of an  
504 inducible regulatory device for the precise regulation of gene expression. *Metab. Eng.* 37, 11–23.  
505 doi:10.1016/j.ymben.2016.03.008.

- 506 Hüsken, L. E., Beeftink, R., De Bont, J. A. M., and Wery, J. (2001). High-rate 3-methylcatechol  
507 production in *Pseudomonas putida* strains by means of a novel expression system. Appl.  
508 Microbiol. Biotechnol. 55, 571–577. doi:10.1007/s002530000566.
- 509 Jahn, M., Vorpahl, C., Türkowsky, D., Lindmeyer, M., Bühler, B., Harms, H., et al. (2014). Accurate  
510 determination of plasmid copy number of flow-sorted cells using droplet digital PCR. Anal.  
511 Chem. 86, 5969–5976. doi:10.1021/ac501118v.
- 512 Jusiak, B., Cleto, S., Perez-Piñera, P., and Lu, T. K. (2016). Engineering Synthetic Gene Circuits in  
513 Living Cells with CRISPR Technology. Trends Biotechnol. 34, 535–547.  
514 doi:10.1016/j.tibtech.2015.12.014.
- 515 Köhler, K. a K., Rückert, C., Schatschneider, S., Vorhölter, F. J., Szczepanowski, R., Blank, L. M., et  
516 al. (2013). Complete genome sequence of *Pseudomonas* sp. strain VLB120 a solvent tolerant,  
517 styrene degrading bacterium, isolated from forest soil. J. Biotechnol. 168, 729–730.  
518 doi:10.1016/j.jbiotec.2013.10.016.
- 519 Landgraf, D. (2012). Quantifying Localizations and Dynamics in Single Bacterial Cells. Available at:  
520 <https://dash.harvard.edu/handle/1/9920184?show=full>.
- 521 Lang, K., Zierow, J., Buehler, K., and Schmid, A. (2014). Metabolic engineering of *Pseudomonas* sp.  
522 strain VLB120 as platform biocatalyst for the production of isobutyric acid and other secondary  
523 metabolites. Microb. Cell Fact. 13, 2. doi:10.1186/1475-2859-13-2.
- 524 Lenzen, C., Wynands, B., Otto, M., Bolzenius, J., Mennicken, P., Blank, L. M., et al. (2019). High-  
525 Yield Production of 4-Hydroxybenzoate From Glucose or Glycerol by an Engineered  
526 *Pseudomonas taiwanensis* VLB120. Front. Bioeng. Biotechnol. 7, 1–17.  
527 doi:10.3389/fbioe.2019.00130.
- 528 Lindmeyer, M., Jahn, M., Vorpahl, C., Müller, S., Schmid, A., and Bühler, B. (2015). Variability in  
529 subpopulation formation propagates into biocatalytic variability of engineered *Pseudomonas*  
530 *putida* strains. Front. Microbiol. 6, 1–15. doi:10.3389/fmicb.2015.01042.
- 531 Liu, L., Yang, H., Shin, H., Chen, R. R., Li, J., Du, G., et al. (2013). How to achieve high-level  
532 expression of microbial enzymes Strategies and perspectives © 2013 Landes Bioscience . Do not  
533 distribute. Bioengineered 4, 212–223. doi:10.4161/bioe.24761.
- 534 Lou, C., Stanton, B., Chen, Y.-J., Munsky, B., and Voigt, C. A. (2012). Ribozyme-based insulator parts  
535 buffer synthetic circuits from genetic context. Nat. Biotechnol. 30, 1137–42.  
536 doi:10.1038/nbt.2401.
- 537 Martínez-García, E., and de Lorenzo, V. (2011). Engineering multiple genomic deletions in Gram-  
538 negative bacteria: Analysis of the multi-resistant antibiotic profile of *Pseudomonas putida*  
539 KT2440. Environ. Microbiol. 13, 2702–2716. doi:10.1111/j.1462-2920.2011.02538.x.
- 540 Mi, J., Sydow, A., Schempp, F., Becher, D., Schewe, H., Schrader, J., et al. (2016). Investigation of  
541 plasmid-induced growth defect in *Pseudomonas putida*. J. Biotechnol. 231, 167–173.  
542 doi:10.1016/j.jbiotec.2016.06.001.
- 543 Mutalik, V. K., Guimaraes, J. C., Cambray, G., Lam, C., Christoffersen, M. J., Mai, Q.-A., et al. (2013).



- 544 Precise and reliable gene expression via standard transcription and translation initiation elements.  
545 Nat. Methods 10, 354–60. doi:10.1038/nmeth.2404.
- 546 Nielsen, A. a K., Segall-Shapiro, T. H., and Voigt, C. a. (2013). Advances in genetic circuit design:  
547 Novel biochemistries, deep part mining, and precision gene expression. Curr. Opin. Chem. Biol.  
548 17, 878–892. doi:10.1016/j.cbpa.2013.10.003.
- 549 Otto, M., Wynands, B., Drepper, T., Jaeger, K.-E., Thies, S., Loeschcke, A., et al. (2019). Targeting  
550 16S ribosomal DNA for stable recombinant gene expression in *Pseudomonas*. ACS Synth. Biol.,  
551 acssynbio.9b00195. doi:10.1021/acssynbio.9b00195.
- 552 Panke, S., Witholt, B., Schmid, a, and Wubbolts, M. G. (1998). Towards a biocatalyst for (*S*)-styrene  
553 oxide production: characterization of the styrene degradation pathway of *Pseudomonas* sp. strain  
554 VLB120. Appl. Environ. Microbiol. 64, 2032–2043.
- 555 Park, J.-B., Bühler, B., Panke, S., Witholt, B., and Schmid, A. (2007). Carbon metabolism and product  
556 inhibition determine the epoxidation efficiency of solvent-tolerant *Pseudomonas* sp. strain  
557 VLB120ΔC. Biotechnol. Bioeng. 98, 1219–1229. doi:10.1002/bit.21496.
- 558 Puigbo, P., Guzman, E., Romeu, A., and Garcia-Vallve, S. (2007). OPTIMIZER: a web server for  
559 optimizing the codon usage of DNA sequences. Nucleic Acids Res. 35, W126–W131.  
560 doi:10.1093/nar/gkm219.
- 561 Salis, H. M., Mirsky, E. A., and Voigt, C. A. (2009). Automated design of synthetic ribosome binding  
562 sites to control protein expression. Nat. Biotechnol. 27, 946–950. doi:10.1038/nbt.1568.
- 563 Schmitz, S., Nies, S., Wierckx, N., Blank, L. M., and Rosenbaum, M. A. (2015). Engineering mediator-  
564 based electroactivity in the obligate aerobic bacterium *Pseudomonas putida* KT2440. Front.  
565 Microbiol. 6, 1–13. doi:10.3389/fmicb.2015.00284.
- 566 Terpe, K. (2006). Overview of bacterial expression systems for heterologous protein production: From  
567 molecular and biochemical fundamentals to commercial systems. Appl. Microbiol. Biotechnol.  
568 72, 211–222. doi:10.1007/s00253-006-0465-8.
- 569 Verhoef, S., Wierckx, N., Westerhof, R. G. M., De Winde, J. H., and Ruijssenaars, H. J. (2009).  
570 Bioproduction of p-hydroxystyrene from glucose by the solvent-tolerant bacterium *Pseudomonas*  
571 *putida* S12 in a two-phase water-decanol fermentation. Appl. Environ. Microbiol. 75, 931–936.  
572 doi:10.1128/AEM.02186-08.
- 573 Viegas, S. C., Apura, P., Martínez-García, E., De Lorenzo, V., and Arraiano, C. M. (2018). Modulating  
574 Heterologous Gene Expression with Portable mRNA-Stabilizing 5'-UTR Sequences. ACS Synth.  
575 Biol. 7, 2177–2188. doi:10.1021/acssynbio.8b00191.
- 576 Voigt, C. A. (2006). Genetic parts to program bacteria. Curr. Opin. Biotechnol. 17, 548–557.  
577 doi:10.1016/j.copbio.2006.09.001.
- 578 Wierckx, N. J. P., Ballerstedt, H., de Bont, J. A. M., and Wery, J. (2005). Engineering of Solvent-  
579 Tolerant *Pseudomonas putida* S12 for Bioproduction of Phenol from Glucose. Appl. Environ.  
580 Microbiol. 71, 8221–8227. doi:10.1128/AEM.71.12.8221-8227.2005.

- 581 Wynands, B., Lenzen, C., Otto, M., Koch, F., Blank, L. M., and Wierckx, N. (2018). Metabolic  
582 engineering of *Pseudomonas taiwanensis* VLB120 with minimal genomic modifications for high-  
583 yield phenol production. *Metab. Eng.* 47, 121–133. doi:10.1016/j.ymben.2018.03.011.
- 584 Zobel, S., Benedetti, I., Eisenbach, L., de Lorenzo, V., Wierckx, N., and Blank, L. M. (2015). Tn7-  
585 Based Device for Calibrated Heterologous Gene Expression in *Pseudomonas putida*. *ACS Synth.*  
586 *Biol.* 4, 1341–1351. doi:10.1021/acssynbio.5b00058.
